# Supplementary material for: Porous titanium and zirconium oxo carboxylates at the interface between sol–gel and metal–organic framework structures
Source: Royal Society of Chemistry journal article supplement (doi:10.1039/c3dt51285a), 2013-10-24

## Electronic Supplementary Information

C. Maurer, B. Baumgartner, S. Pabisch, J. Akbarzadeh, H. Peterlik, U. Schubert

### Porous titanium and zirconium oxo carboxylates at the interface between sol-gel and metal-organic framework structures

**Table S1:** Stoichiometric ratios and proportions of reagents used in the reactions

*TiO\_BT3:*

| Ti/COOH/H <sub>2</sub> O ratio | Ti(O <sup>i</sup> Pr) <sub>4</sub> | BTB3               | H <sub>2</sub> O   |
|--------------------------------|------------------------------------|--------------------|--------------------|
| 1:1:2                          | 0.15 ml (0.50 mmol)                | 72 mg (0.165 mmol) | 18 μl (0.99 mmol)  |
| 1:1:4                          | 0.15 ml (0.50 mmol)                | 72 mg (0.165 mmol) | 36 μl (1.98 mmol)  |
| 2:1:4                          | 0.3 ml (0.99 mmol)                 | 72 mg (0.165 mmol) | 36 μl (1.98 mmol)  |
| 2:1:8                          | 0.3 ml (0.99 mmol)                 | 72 mg (0.165 mmol) | 72 μl (3.96 mmol)  |
| 3:1:6                          | 0.225 ml (0.74 mmol)               | 36 mg (0.083 mmol) | 27 μl (1.49 mmol)  |
| 3:1:12                         | 0.225 ml (0.74 mmol)               | 36 mg (0.083 mmol) | 54 μl (2.97 mmol)  |
| 4:1:8                          | 0.3 ml (0.99 mmol)                 | 36 mg (0.083 mmol) | 36 μl (1.98 mmol)  |
| 4:1:16                         | 0.3 ml (0.99 mmol)                 | 36 mg (0.083 mmol) | 72 μl (3.96 mmol)  |
| 6:1:12                         | 0.45 ml (1.49 mmol)                | 36 mg (0.083 mmol) | 54 μl (2.97 mmol)  |
| 6:1:24                         | 0.45 ml (1.49 mmol)                | 36 mg (0.083 mmol) | 107 μl (5.94 mmol) |

*TiO\_TCB:*

| Ti/COOH/H <sub>2</sub> O ratio | Ti(O <sup>i</sup> Pr) <sub>4</sub> | TCB               | H <sub>2</sub> O   |
|--------------------------------|------------------------------------|-------------------|--------------------|
| 1:1:2                          | 0.2 ml (0.66 mmol)                 | 46 mg (0.22 mmol) | 24 μl (1.32 mmol)  |
| 1:1:4                          | 0.2 ml (0.66 mmol)                 | 46 mg (0.22 mmol) | 48 μl (2.64 mmol)  |
| 2:1:4                          | 0.4 ml (1.32 mmol)                 | 46 mg (0.22 mmol) | 48 μl (2.64 mmol)  |
| 2:1:8                          | 0.4 ml (1.32 mmol)                 | 46 mg (0.22 mmol) | 96 μl (5.28 mmol)  |
| 3:1:6                          | 0.6 ml (1.98 mmol)                 | 46 mg (0.22 mmol) | 72 μl (3.96 mmol)  |
| 4:1:8                          | 0.8 ml (2.64 mmol)                 | 46 mg (0.22 mmol) | 96 μl (5.28 mmol)  |
| 6:1:12                         | 1.2 ml (3.96 mmol)                 | 46 mg (0.22 mmol) | 144 μl (7.92 mmol) |

*TiO\_BTBA:*

| Ti/COOH/H <sub>2</sub> O ratio | Ti(O <sup>i</sup> Pr) <sub>4</sub> | BTB4               | H <sub>2</sub> O  |
|--------------------------------|------------------------------------|--------------------|-------------------|
| 1:1:2                          | 0.1 ml (0.33 mmol)                 | 46 mg (0.083 mmol) | 12 µl (0.66 mmol) |
| 1:1:4                          | 0.1 ml (0.33 mmol)                 | 46 mg (0.083 mmol) | 24 µl (1.32 mmol) |
| 2:1:4                          | 0.2 ml (0.66 mmol)                 | 46 mg (0.083 mmol) | 24 µl (1.32 mmol) |
| 2:1:8                          | 0.2 ml (0.66 mmol)                 | 46 mg (0.083 mmol) | 48 µl (2.64 mmol) |
| 3:1:6                          | 0.3 ml (0.99 mmol)                 | 46 mg (0.083 mmol) | 36 µl (1.98 mmol) |
| 3:1:12                         | 0.3 ml (0.99 mmol)                 | 46 mg (0.083 mmol) | 72 µl (3.96 mmol) |
| 4:1:8                          | 0.4 ml (1.32 mmol)                 | 46 mg (0.083 mmol) | 48 µl (2.64 mmol) |
| 4:1:16                         | 0.4 ml (1.32 mmol)                 | 46 mg (0.083 mmol) | 96 µl (5.28 mmol) |
| 6:1:12                         | 0.6 ml (1.49 mmol)                 | 36 mg (0.083 mmol) | 72 µl (3.96 mmol) |

*TiO\_TCPS:*

| Ti/COOH/H <sub>2</sub> O ratio | Ti(O <sup>i</sup> Pr) <sub>4</sub> | TCPS               | H <sub>2</sub> O  |
|--------------------------------|------------------------------------|--------------------|-------------------|
| 1:1:2                          | 0.1 ml (0.33 mmol)                 | 42 mg (0.083 mmol) | 12 µl (0.66 mmol) |
| 1:1:4                          | 0.1 ml (0.33 mmol)                 | 42 mg (0.083 mmol) | 24 µl (1.32 mmol) |
| 2:1:4                          | 0.2 ml (0.66 mmol)                 | 42 mg (0.083 mmol) | 24 µl (1.32 mmol) |
| 2:1:8                          | 0.2 ml (0.66 mmol)                 | 42 mg (0.083 mmol) | 48 µl (2.64 mmol) |
| 3:1:6                          | 0.3 ml (0.99 mmol)                 | 42 mg (0.083 mmol) | 36 µl (1.98 mmol) |
| 3:1:12                         | 0.3 ml (0.99 mmol)                 | 42 mg (0.083 mmol) | 72 µl (3.96 mmol) |
| 4:1:8                          | 0.4 ml (1.32 mmol)                 | 42 mg (0.083 mmol) | 48 µl (2.64 mmol) |
| 4:1:16                         | 0.4 ml (1.32 mmol)                 | 42 mg (0.083 mmol) | 96 µl (5.28 mmol) |

*ZrO\_BTBA3:*

| Zr/COOH/H <sub>2</sub> O ratio | Zr(O <sup>i</sup> Pr) <sub>4</sub> ·( <i>i</i> PrOH) | BTB3               | H <sub>2</sub> O   |
|--------------------------------|------------------------------------------------------|--------------------|--------------------|
| 1:1:2                          | 96 mg (0.25 mmol)                                    | 36 mg (0.083 mmol) | 9 µl (0.496 mmol)  |
| 1:1:4                          | 96 mg (0.25 mmol)                                    | 36 mg (0.083 mmol) | 18 µl (0.99 mmol)  |
| 2:1:4                          | 192 mg (0.50 mmol)                                   | 36 mg (0.083 mmol) | 18 µl (0.99 mmol)  |
| 2:1:8                          | 192 mg (0.50 mmol)                                   | 36 mg (0.083 mmol) | 36 µl (1.98 mmol)  |
| 3:1:6                          | 288 mg (0.74 mmol)                                   | 36 mg (0.083 mmol) | 27 µl (1.485 mmol) |
| 3:1:12                         | 288 mg (0.74 mmol)                                   | 36 mg (0.083 mmol) | 54 µl (2.97 mmol)  |
| 4:1:8                          | 384 mg (0.99 mmol)                                   | 36 mg (0.083 mmol) | 36 µl (1.98 mmol)  |
| 4:1:16                         | 384 mg (0.99 mmol)                                   | 36 mg (0.083 mmol) | 72 µl (3.96 mmol)  |

**Table S2:** Summary of microporous surface areas of TiO<sub>2</sub> carboxylates.

| <i>TiO<sub>2</sub>_TCB</i>                  |       |       |       |       |        |         |         |        |        |        |
|---------------------------------------------|-------|-------|-------|-------|--------|---------|---------|--------|--------|--------|
| <b>Ti:COOH:H<sub>2</sub>O</b>               | 1:1:2 | 1:1:4 | 2:1:4 | 2:1:8 | 9:1:18 | 12:1:24 | 18:1:36 |        |        |        |
| <b>S<sub>t-plot</sub> [m<sup>2</sup>/g]</b> | 199.6 | 203.6 | 214.5 | 221.2 | 227.7  | 247.6   | 232.2   |        |        |        |
| <i>TiO<sub>2</sub>_BTB3</i>                 |       |       |       |       |        |         |         |        |        |        |
| <b>Ti:COOH:H<sub>2</sub>O</b>               | 1:1:2 | 1:1:4 | 2:1:4 | 2:1:8 | 3:1:6  | 3:1:12  | 4:1:8   | 4:1:16 | 6:1:12 | 6:1:24 |
| <b>S<sub>t-plot</sub> [m<sup>2</sup>/g]</b> | 280.6 | 336.8 | 303.4 | 277.3 | 256.2  | 226.5   | 256.2   | 276.3  | 149.8  | 205.8  |
| <i>Ti<sub>2</sub>_BTB4</i>                  |       |       |       |       |        |         |         |        |        |        |
| <b>Ti:COOH:H<sub>2</sub>O</b>               | 1:1:2 | 1:1:4 | 2:1:4 | 2:1:8 | 3:1:6  | 3:1:12  | 4:1:8   | 4:1:16 | 6:1:12 |        |
| <b>S<sub>t-plot</sub> [m<sup>2</sup>/g]</b> | 191.6 | 284.1 | 183.5 | 267.4 | 191.0  | 282.2   | 199.0   | 246.7  | 195.5  |        |
| <i>TiO<sub>2</sub>_TCPS</i>                 |       |       |       |       |        |         |         |        |        |        |
| <b>Ti:COOH:H<sub>2</sub>O</b>               | 1:1:2 | 1:1:4 | 2:1:4 | 2:1:8 | 3:1:6  | 3:1:12  | 4:1:8   | 4:1:16 |        |        |
| <b>S<sub>t-plot</sub> [m<sup>2</sup>/g]</b> | 297.1 | 174.5 | 271.3 | 0     | 207.5  | 31.2    | 223.9   | 114.5  |        |        |

**Table S3:** Summary of microporous surface areas of ZrO<sub>2</sub> BTB3.

| <i>ZrO<sub>2</sub>_BTB3</i>                 |       |       |       |       |       |        |       |        |  |
|---------------------------------------------|-------|-------|-------|-------|-------|--------|-------|--------|--|
| <b>Zr:COOH:H<sub>2</sub>O</b>               | 1:1:2 | 1:1:4 | 2:1:4 | 2:1:8 | 3:1:6 | 3:1:12 | 4:1:8 | 4:1:16 |  |
| <b>S<sub>t-plot</sub> [m<sup>2</sup>/g]</b> | 267.4 | 254.4 | 212.4 | 192.8 | 93.1  | 120.7  | 158.5 | 141.2  |  |

**Fig. S1** IR spectra of TiO\_TCB with a Ti:H<sub>2</sub>O ratio of 1:2 and varying Ti:COOH ratios.

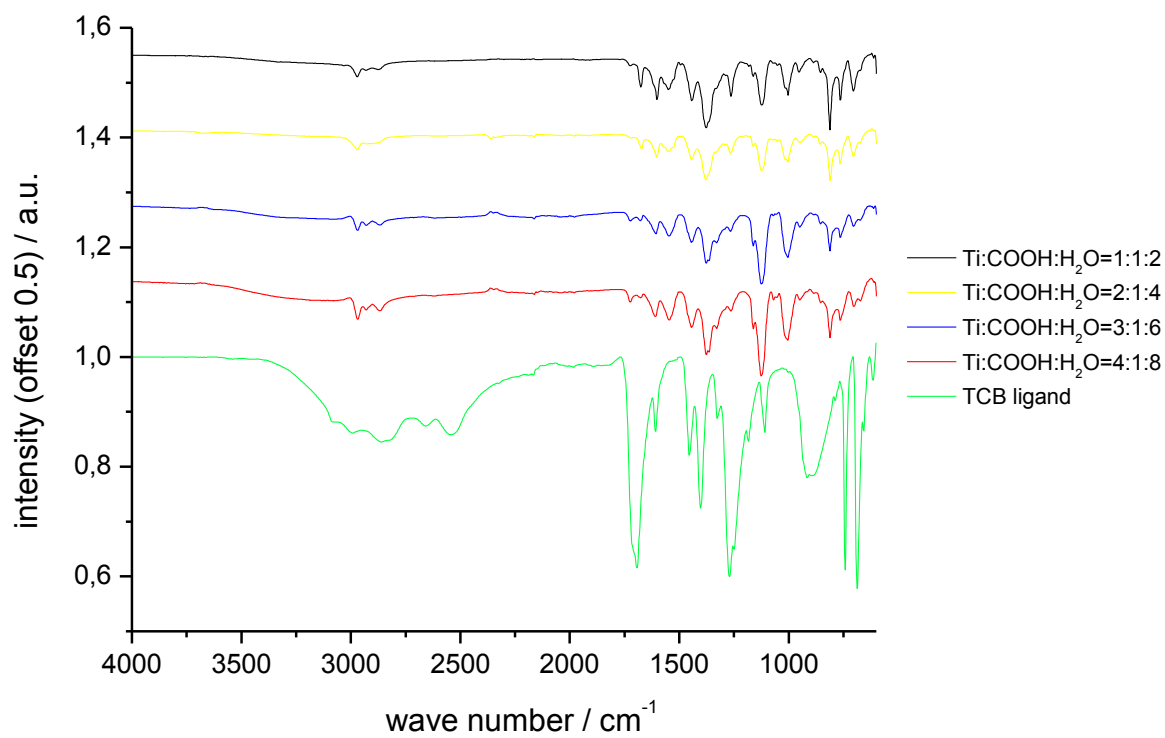

**Fig. S2** SAXS patterns of TiO\_BT3 with varying Ti:COOH ratios (the SAXS patterns are plotted with an offset of 60% on the y axis). The experimental data are depicted as lines and not as symbols for clarity. Solid lines: Ti:H<sub>2</sub>O ratio = 1:2; dotted lines: Ti:H<sub>2</sub>O ratio = 1:4 (Note that samples with a Ti:COOH ratio of 1:1 are also included, different to the TiO\_BT4 samples in Fig. 6).

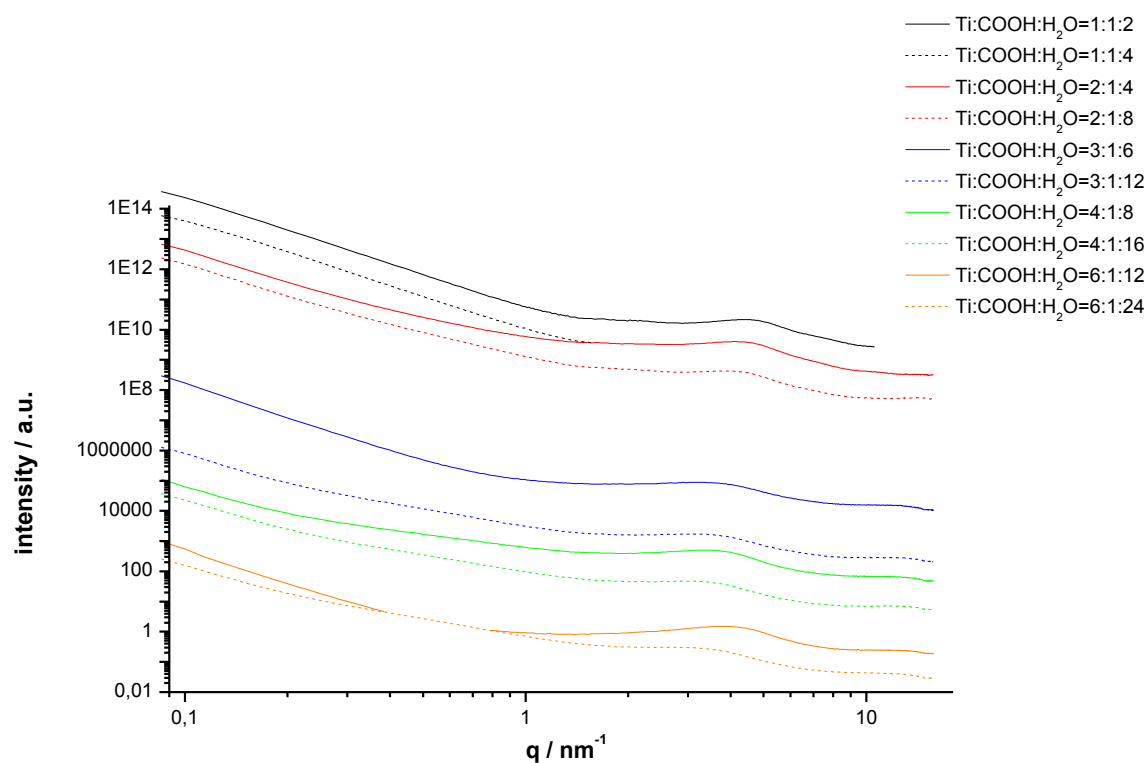

**Fig. S3** Fractal dimension (top), hard sphere volume fraction (center) and distance  $d_{HS}$  (bottom) for TiO\_BT3.

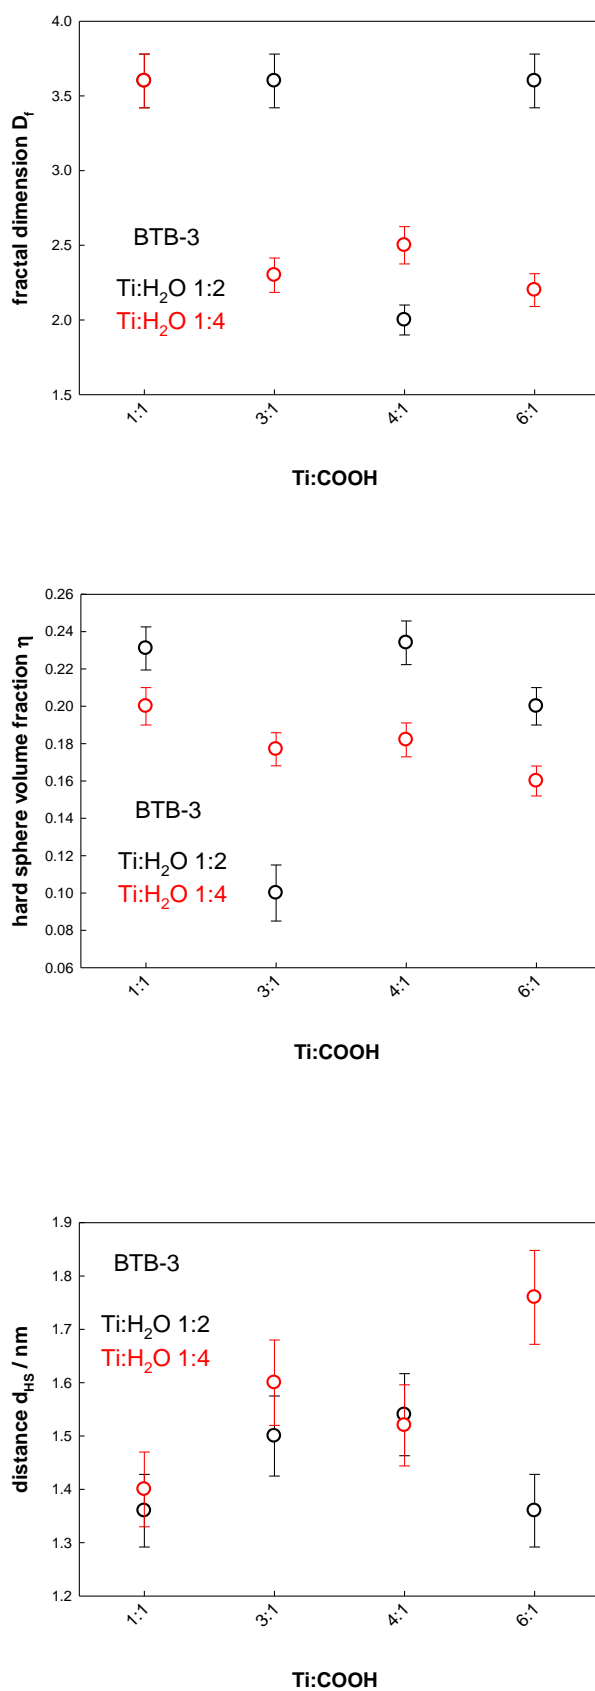

**Fig. S4** Fractal dimension (top), hard sphere volume fraction (center) and distance  $d_{HS}$  (bottom) for TiO\_TCB.

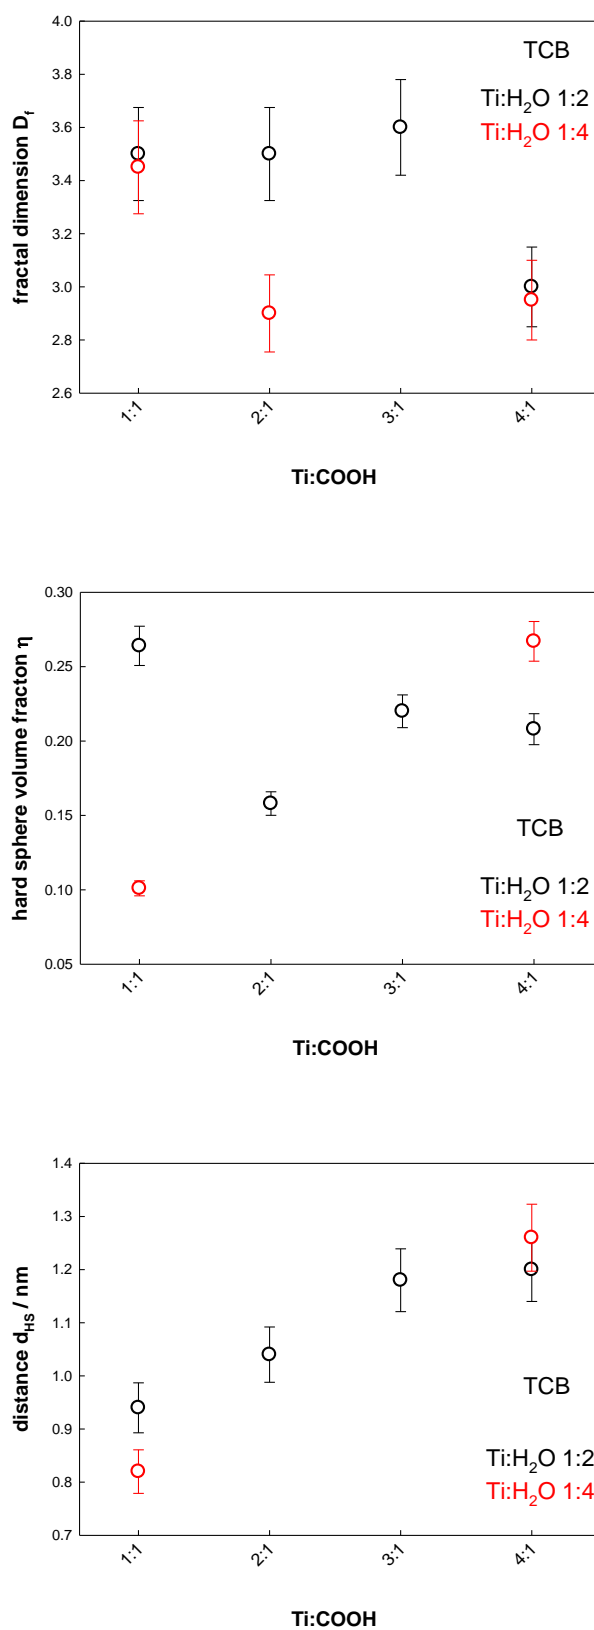

**Fig. S5** Radius of gyration  $r_{g1}$  of the large dimension of the structure in dependence of the water proportion for TiO\_BTb4, TiO\_BTb3, TiO\_TCPS, and ZrO\_BTb3.

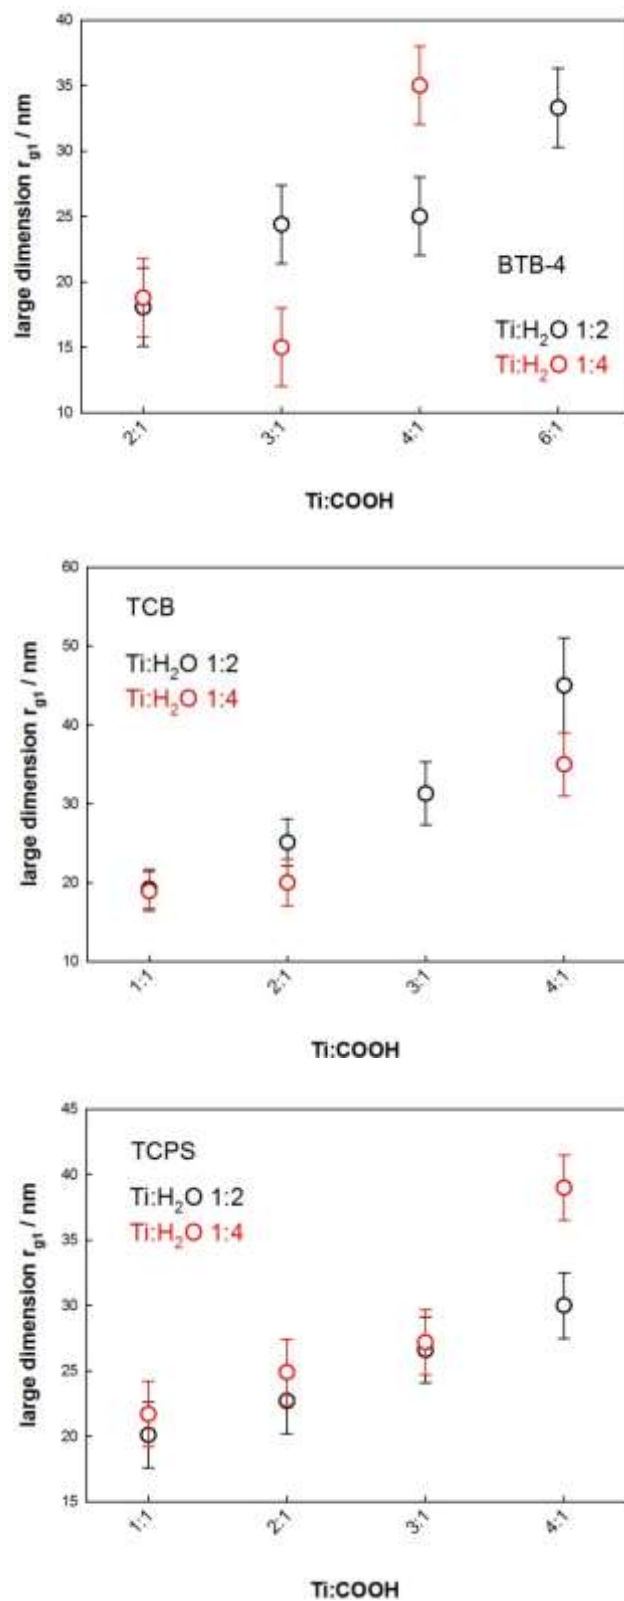



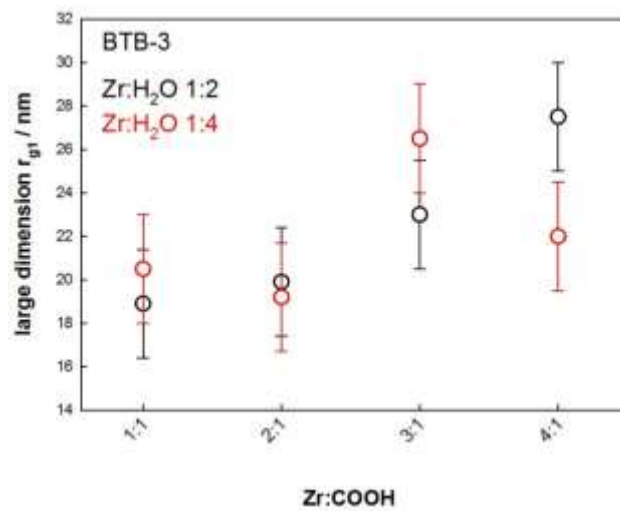

**Fig. S6** Fractal dimension (top), hard sphere volume fraction (center) and distance  $d_{HS}$  (bottom) for TiO\_TCPS.

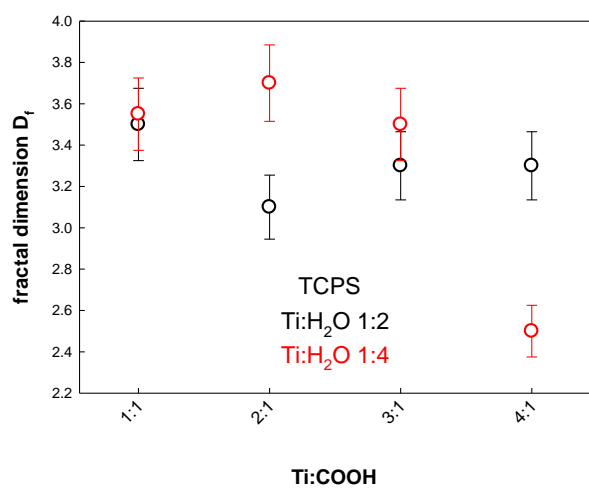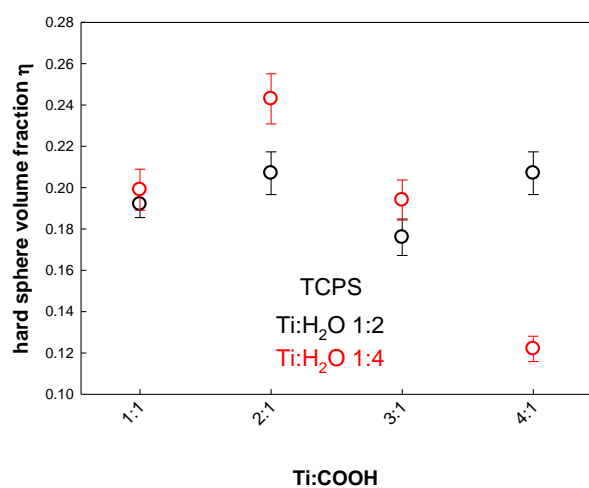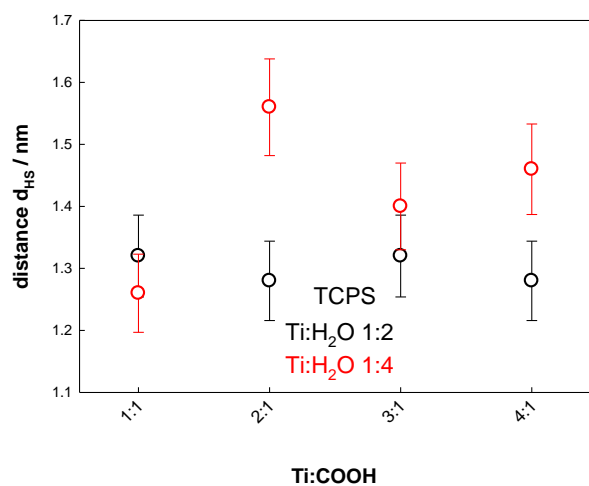

**Fig. S7** IR spectra of ZrO\_BT3 with Zr:H<sub>2</sub>O ratios of 1:2 and varying Zr:COOH ratios.

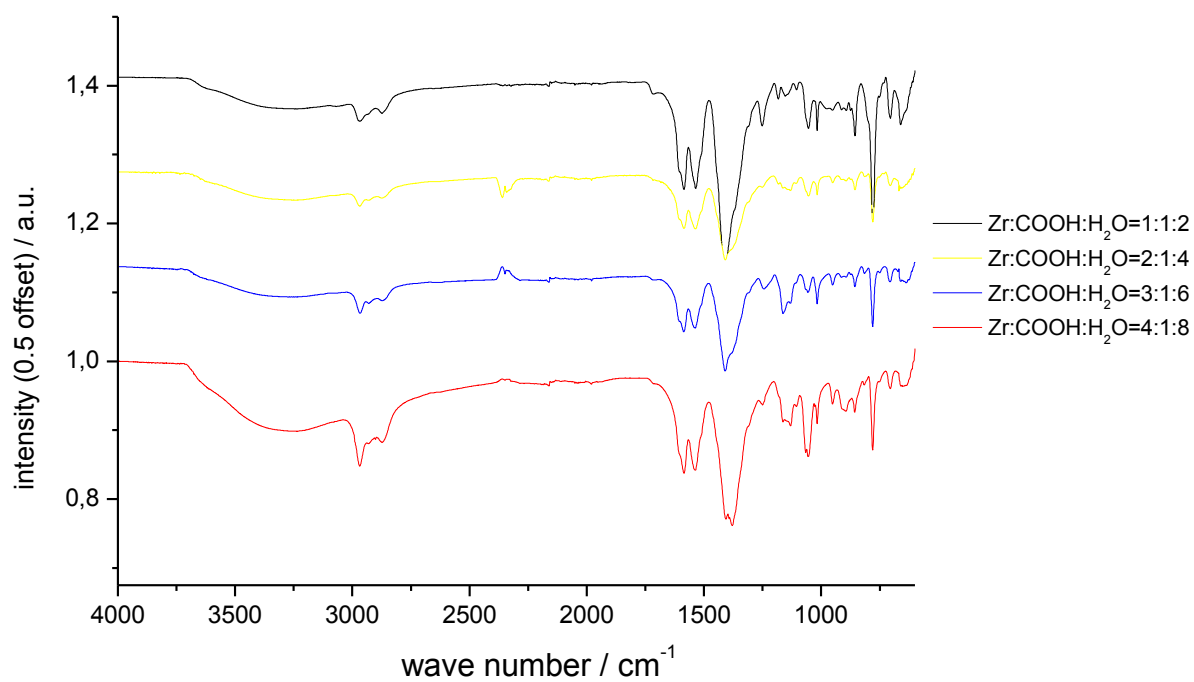

**Fig. S8** Fractal dimension (top), hard sphere volume fraction (center) and distance  $d_{HS}$  (bottom) for ZrO\_BT3.

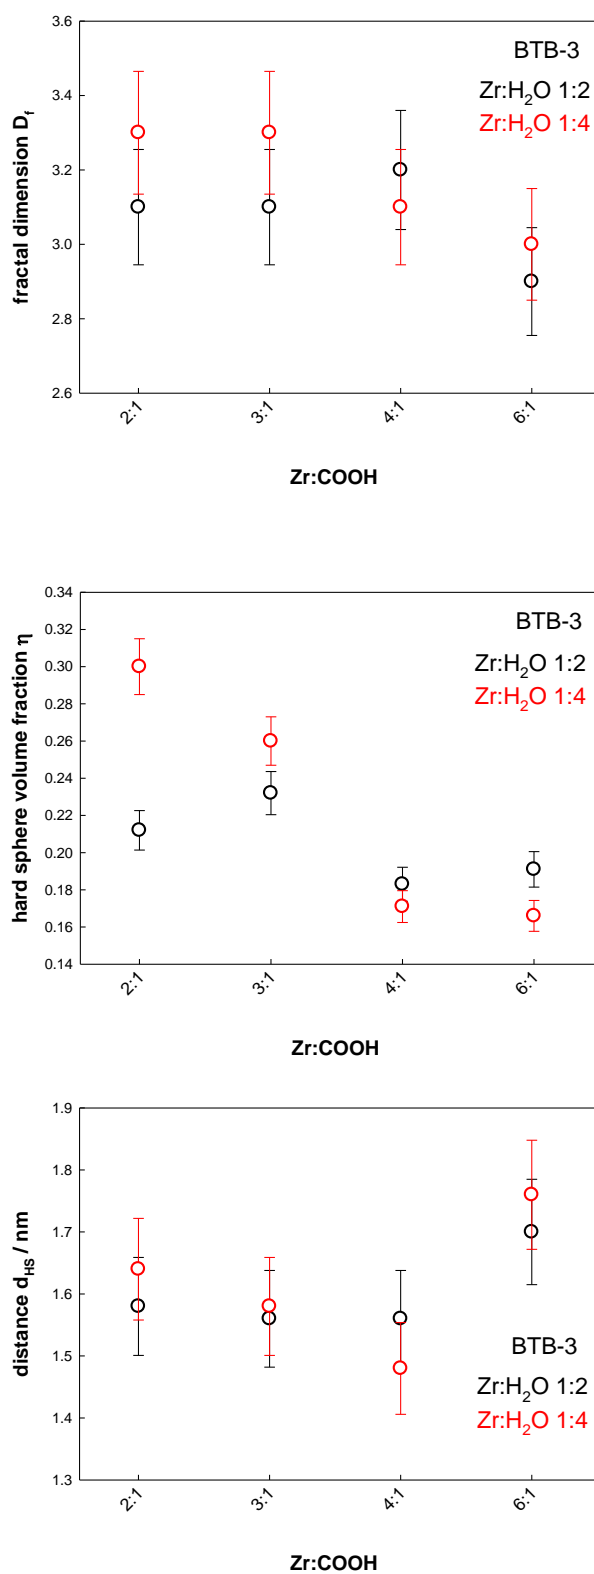

Supplement: c3dt51285a.pdf [file c3dt51285a.pdf]
